# Supplementary material for: Construction and validation of a prognostic model for colorectal cancer based on migrasome-related long non-coding RNAs
Source: PeerJ journal article supplement (doi:10.7717/peerj.19443), 2025-05-14
Supplement: MIQE_checklist.xls [file MIQE_checklist.xls]

## Sheet: Sheet1
ITEM TO CHECK	IMPORTANCE	CHECKLIST
EXPERIMENTAL DESIGN
Definition of experimental and control groups	E	Line 191
Number within each group	E	Line 198
Assay carried out by core lab or investigator's lab?	D
Acknowledgement of authors' contributions	D
SAMPLE
Description	E	Line 191
Volume/mass of sample processed	D
Microdissection or macrodissection	E	Line 198
Processing procedure	E	Line 191
If frozen - how and how quickly?	E
If fixed - with what, how quickly?	E
Sample storage conditions and duration (especially for FFPE samples)	E	Line 197
NUCLEIC ACID EXTRACTION
Procedure and/or instrumentation	E	Line 207
Name of kit and details of any modifications	E	Line 207
Source of additional reagents used	D
Details of DNase or RNAse treatment	E	Line 207
Contamination assessment (DNA or RNA)	E	Line 207
Nucleic acid quantification	E	Line 208
Instrument and method	E	Line 209
Purity (A260/A280)	D
Yield	D
RNA integrity method/instrument	E	Line 206
RIN/RQI or Cq of 3' and 5' transcripts	E	Line 206
Electrophoresis traces	D
Inhibition testing (Cq dilutions, spike or other)	E	Line 206
REVERSE TRANSCRIPTION
Complete reaction conditions	E	Line 211
Amount of RNA and reaction volume	E	Line 211
Priming oligonucleotide (if using GSP) and concentration	E	Line 211
Reverse transcriptase and concentration	E	Line 211
Temperature and time	E	Line 211
Manufacturer of reagents and catalogue numbers	D
Cqs with and without RT	D*
Storage conditions of cDNA	D
qPCR TARGET INFORMATION
If multiplex, efficiency and LOD of each assay.	E	Line 213
Sequence accession number	E	Line 213
Location of amplicon	D
Amplicon length	E	Line 213
In silico specificity screen (BLAST, etc)	E	Line 213
Pseudogenes, retropseudogenes or other homologs?	D
Sequence alignment	D
Secondary structure analysis of amplicon	D
Location of each primer by exon or intron (if applicable)	E	Line 215
What splice variants are targeted?	E	Line 215
qPCR OLIGONUCLEOTIDES
Primer sequences	E	Line 215
RTPrimerDB Identification Number	D
Probe sequences	D**
Location and identity of any modifications	E	Line 216
Manufacturer of oligonucleotides	D
Purification method	D
qPCR PROTOCOL
Complete reaction conditions	E	Line 216
Reaction volume and amount of cDNA/DNA	E	Line 216
Primer, (probe), Mg++ and dNTP concentrations	E	Line 216
Polymerase identity and concentration	E	Line 216
Buffer/kit identity and manufacturer	E	Line 216
Exact chemical constitution of the buffer	D
Additives (SYBR Green I, DMSO, etc.)	E	Line 216
Manufacturer of plates/tubes and catalog number	D
Complete thermocycling parameters	E	Line 216
Reaction setup (manual/robotic)	D
Manufacturer of qPCR instrument	E	Line 216
qPCR VALIDATION
Evidence of optimisation (from gradients)	D
Specificity (gel, sequence, melt, or digest)	E	Line 220
For SYBR Green I, Cq of the NTC	E	Line 220
Standard curves with slope and y-intercept	E	Line 220
PCR efficiency calculated from slope	E	Line 220
Confidence interval for PCR efficiency or standard error	D
r2 of standard curve	E	Line 220
Linear dynamic range	E	Line 220
Cq variation at lower limit	E	Line 220
Confidence intervals throughout range	D
Evidence for limit of detection	E	Line 220
If multiplex, efficiency and LOD of each assay.	E	Line 220
DATA ANALYSIS
qPCR analysis program (source, version)	E	Line 224
Cq method determination	E	Line 224
Outlier identification and disposition	E	Line 224
Results of NTCs	E	Line 224
Justification of number and choice of reference genes	E	Line 224
Description of normalisation method	E	Line 224
Number and concordance of biological replicates	D
Number and stage (RT or qPCR) of technical replicates	E	Line 225
Repeatability (intra-assay variation)	E	Line 225
Reproducibility (inter-assay variation, %CV)	D
Power analysis	D
Statistical methods for result significance	E	Line 225
Software (source, version)	E	Line 226
Cq or raw data submission using RDML	D
Table 1. MIQE checklist for authors, reviewers and editors. All essential information (E) must be submitted with the manuscript. Desirable
information (D) should be submitted if available. If using primers obtained from RTPrimerDB, information on qPCR target, oligonucleotides,
protocols and validation is available from that source.
*: Assessing the absence of DNA using a no RT assay is essential when first extracting RNA. Once the sample has been validated as
RDNA-free, inclusion of a no-RT control is desirable, but no longer essential.
**: Disclosure of the probe sequence is highly desirable and strongly encouraged. However, since not all commercial pre-designed assay
vendors provide this information, it cannot be an essential requirement. Use of such assays is advised against.
