# Supplementary material for: Construction and validation of a prognostic model for colorectal cancer based on migrasome-related long non-coding RNAs
Source: PeerJ journal article supplement (doi:10.7717/peerj.19443), 2025-05-14
Supplement: Raw_data_for_fig10.xlsx [file Raw_data_for_fig10.xlsx]

## Sheet: Sheet1
	NCM460			HCT116			DLD-1			SW620			RKO
AC004846.1	1.18921	1.07177	0.784584	6.82108	5.24157	6.9163	4.82323	5.85634	4.50023	2.64512	3.12387	3.23403	4.82323	4.99332	3.70635
AC010789.2	0.880666	1.21982	0.93088	2.40605	2.22942	2.30804	0.838956	1.06191	0.782773	6.86852	7.6211	7.3615	3.08799	3.72352	4.07462
ZEB1-AS1	0.880666	1.30737	0.868541	4.10296	6.09095	4.33691	0.777366	0.850667	0.833161	12.3805	10.6295	10.5561	17.5898	14.9977	15.4193
LCMT1-AS1	0.972655	1.02811	1	8.57419	9.12611	7.6211	0.773782	0.702222	0.784584	2.33124	2.14767	2.27021	11.0043	11.3137	12.2101
	AC004846.1		AC010789.2		ZEB1-AS1		LCMT1-AS1
	normal	tumor	normal	tumor	normal	tumor	normal	tumor
1	1.00338	5.93883	1.00119	1.36741	1.00234	1.05753	1.00446	1.91745
2	0.267355	1.38805	0.453071	1.5469	5.05465	23.3774	3.64238	6.66603
3	2.11277	3.25863	0.030671	3.01731	0.916009	4.65117	2.65286	6.13894
4	4.12483	2.38379	0.270461	0.632757	4.7033	11.2602	4.5968	0.627355
5	5.09389	0.958552	0.02963	0.434222	1.08084	0.882645	0.285399	0.141546
6	1.63759	7.31006	1.23348	0.062039	9.51098	3.76832	0.81537	5.70215
7	0.548653	0.288642	1.05742	3.60545	9.1474	24.2508	1.02978	1.48328
8	1.02577	1.55125	0.155282	5.06771	6.98347	16.3258	0.86777	0.277674
9	2.39484	0.342584	0.17547	1.64793	5.11425	1.86791	2.04327	2.99135
10	0.288691	1.01585	5.35865	1.26138	6.58235	5.77525	1.19684	4.91768
11	3.40273	5.30279	0.057424	0.199482	2.39384	9.31926	0.788101	2.051
12	1.99163	6.24163	0.991233	2.3567	2.17185	14.0614	1.56656	6.74198
13	4.15345	8.1714	2.54789	4.84587	3.88802	20.3638	1.94461	5.11073
14	0.322636	1.5084	0.991675	5.30615	10.6249	4.62903	0.515221	5.01754
15	0.049053	0.263538	0.134201	0.059414	3.25716	22.476	1.36737	3.89259
16	2.24074	7.14984	0.552912	1.19659	1.76177	9.91415	2.90465	2.54623
17	1.26481	2.46161	1.17759	3.43708	1.73835	15.9408	0.952871	0.809465
18	0.297364	0.55982	1.1871	6.90761	10.0509	25.3663	1.67344	1.68866
19	0.055696	0.259674	2.54022	3.00609	4.58727	16.64	2.45193	0.435128
20	3.55959	5.55922	0.397355	2.36414	6.05984	9.2871	2.12979	0.783948
