# Supplementary material for: Construction and validation of a prognostic model for colorectal cancer based on migrasome-related long non-coding RNAs
Source: PeerJ journal article supplement (doi:10.7717/peerj.19443), 2025-05-14
Supplement: Raw_data_for_fig11.xlsx [file Raw_data_for_fig11.xlsx]

## Sheet: Sheet1
si-LCMT1-AS1	HCT116				RKO
	si-NC	1	2	3	si-NC	1	2	3
	1.03888	0.504901	0.348373	0.208478	1.05202	0.68426	0.682105	0.488695
	1.06047	0.379682	0.498675	0.39708	0.939553	0.677247	0.663276	0.632432
	0.900649	0.428883	0.406809	0.413473	1.00843	0.603577	0.578127	0.57839
Vimentin&E-cadherin		HCT116						RKO
		siNC			si-LCMT1-AS1			siNC			si-LCMT1-AS1
	LCMT1-AS1	1.00189	1.26759	0.730524	0.718156	0.482337	0.667398	1.10484	0.99705	0.898114	0.354005	0.322559	0.3426
	Vimentin	1.35135	0.928845	0.718759	0.483672	0.341267	0.514662	0.998004	1.01398	0.986932	0.399006	0.431332	0.393593
	E-cadherin	1.0101	0.995341	0.993549	7.01455	7.11024	3.26477	1.01044	0.995676	0.993883	2.81435	2.85274	2.95575
CCK-8		HCT116						RKO
		si-NC			si-LCMT1-AS1			si-NC			si-LCMT1-AS1
	0	0.262	0.39	0.3261	0.2665	0.3156	0.2666	0.8361	0.8718	0.8701	0.8542	0.856	0.8344
	24	0.6783	0.6261	0.724	0.4709	0.4933	0.5173	1.814	1.6071	1.8007	1.1152	1.4813	1.3027
	48	1.1984	1.2483	1.3863	0.7934	0.7386	0.7804	1.7226	2.0457	2.0396	1.5428	1.5523	1.5952
	72	1.4201	1.4331	1.4478	1.0105	0.922	0.9222	1.9937	2.0862	2.1019	1.6431	1.6719	1.619
	96	1.4012	1.6365	1.6148	1.027	1.171	1.1069	2.8718	2.7538	2.9355	1.7207	1.8898	1.8486
colony	HCT116		RKO
	si-NC	si-LCMT1-AS1	si-NC	si-LCMT1-AS1
	35	18	102	50
	37	16	140	55
	36	22	104	75
transwell	HCT116		RKO
	si-NC	si-LCMT1-AS1	si-NC	si-LCMT1-AS1
	460	23	601	142
	467	37	587	116
	357	108	695	121
